# Supplementary material
Source: publisher figshare collection journal article supplement (https://acs.figshare.com/ndownloader/files/22068489)
Supplement: Supplementary file 1 [file 22068489]

## Supporting Information

# **Dual Delivery of Alendronate and E7-BMP-2 Peptide *via* Calcium Chelation to Mineralized Nanofiber Fragments for Alveolar Bone Regeneration**

Sunil Kumar Boda,<sup>§,#</sup> Hongjun Wang,<sup>§</sup> Johnson V. John,<sup>§</sup> Richard A. Reinhardt,<sup>¶</sup> and Jingwei Xie<sup>§\*</sup>

<sup>§</sup>Department of Surgery-Transplant and Mary & Dick Holland Regenerative Medicine Program, College of Medicine, University of Nebraska Medical Center, Omaha, NE 68198, USA

<sup>#</sup>Minnesota Dental Research Center for Biomaterials and Biomechanics (MDRCBB), Department of Restorative Sciences, School of Dentistry, University of Minnesota, Minneapolis, MN 55455 USA

<sup>¶</sup>Department of Surgical Specialties, College of Dentistry, University of Nebraska Medical Center, Omaha, NE 68198, USA

\*E-mail: [jingwei.xie@unmc.edu](mailto:jingwei.xie@unmc.edu)

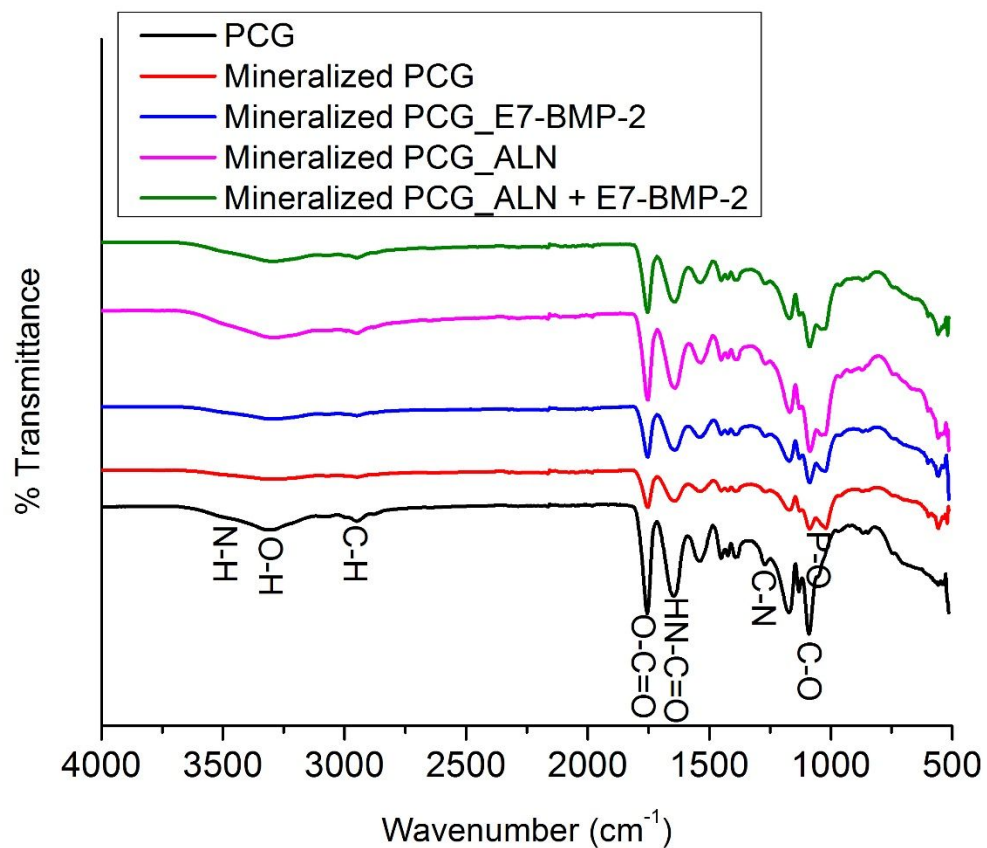

**Figure S1.** FT-IR spectra of PCG and mineralized PCG short fiber fragments before and after loading with Alendronate (ALN) and/ or E7-BMP-2 peptide.

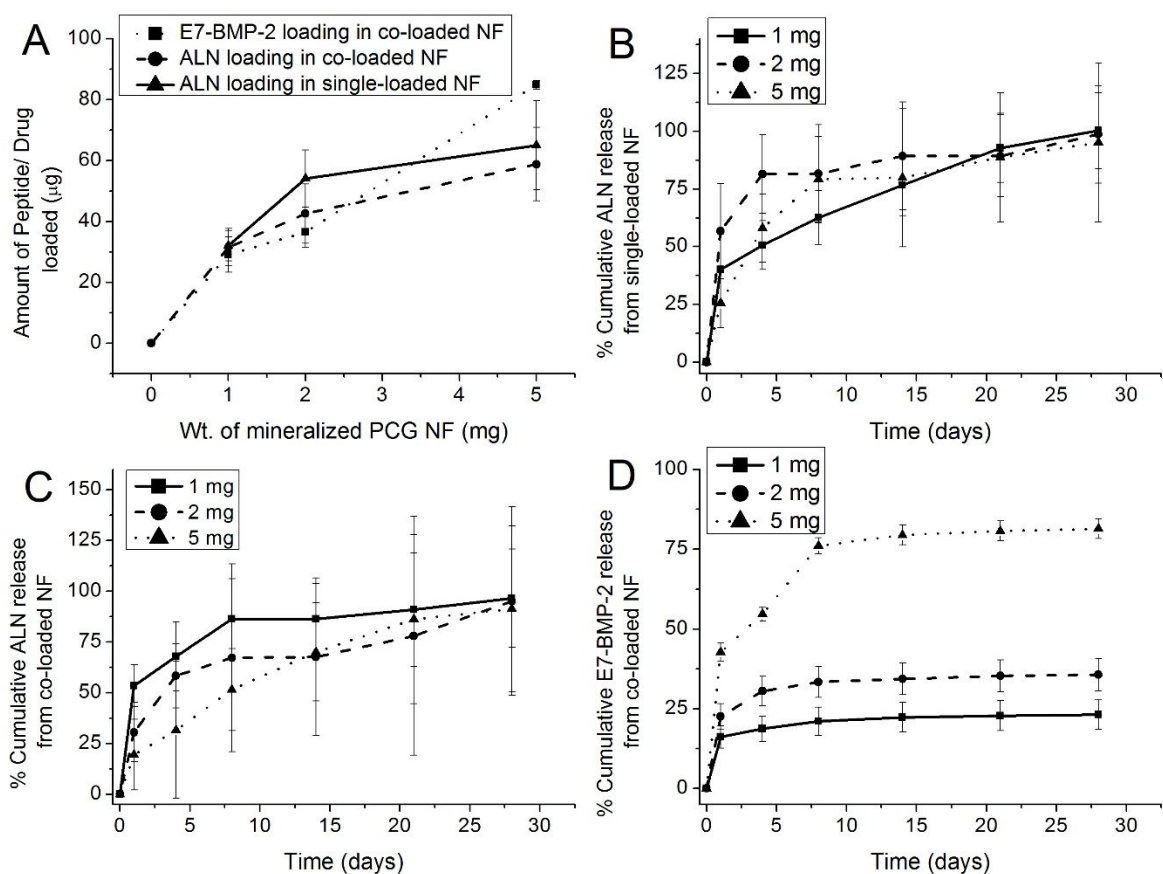

**Figure S2.** (A) Loading of Alendronate-ALN and E7-BMP-2 on mineralized nanofiber fragments when co-immersed in a mixture of ALN (100  $\mu\text{g}/\text{mL}$ ) and E7-BMP-2 (100  $\mu\text{g}/\text{mL}$ ) or ALN (100  $\mu\text{g}/\text{mL}$ ) alone in TBS at room temperature for 24 h. % Cumulative release profiles of (B) ALN from single-loaded NF fragments, (C) ALN from co-loaded NF fragments and (D) E7-BMP-2 from co-loaded NF fragments over 4 weeks.
